# Supplementary material
Source: PubMed Central journal article supplement (PMC3367563)

Supplementary Figure 1S.

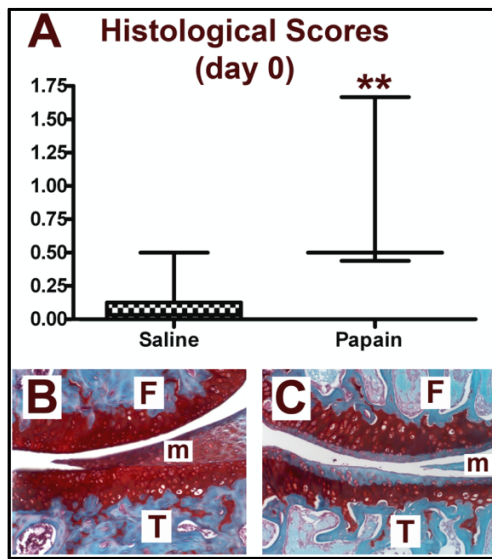

Supplement: NIHMS374079-supplement-supplement_1.pdf [file NIHMS374079-supplement-supplement_1.pdf]
